# Supplementary material for: Sequence diversity and natural selection at domain I of the apical membrane antigen 1 among Indian Plasmodium falciparum populations
Source: PubMed Central journal article supplement (PMC2211494; doi:10.1186/1475-2875-6-154), 2007-11-22
Supplement: 1475-2875-6-154-S2.pdf [file 1475-2875-6-154-S2.pdf]

Table S2. **Region-wise distribution and allelic frequencies of the AMA1 haplotypes**

| Haplotypes <sup>a</sup> | Number (allelic frequency) of <i>P. falciparum</i> isolates |                    |                   |                  |                  |
|-------------------------|-------------------------------------------------------------|--------------------|-------------------|------------------|------------------|
|                         | Assam<br>(n = 28)                                           | Orissa<br>(n = 35) | A & N<br>(n = 40) | UP<br>(n = 36)   | Goa<br>(n = 18)  |
| H1                      | -                                                           | <b>1 (0.028)</b>   | -                 | -                | -                |
| H2                      | -                                                           | <b>1 (0.028)</b>   | -                 | -                | -                |
| H3                      | -                                                           | <b>1 (0.028)</b>   | -                 | -                | -                |
| H4                      | -                                                           | <b>1 (0.028)</b>   | -                 | -                | -                |
| H5                      | -                                                           | <b>1 (0.028)</b>   | -                 | -                | -                |
| H6                      | -                                                           | <b>1 (0.028)</b>   | -                 | -                | -                |
| H7                      | -                                                           | <b>1 (0.028)</b>   | -                 | -                | -                |
| H8                      | -                                                           | <b>1 (0.028)</b>   | -                 | -                | -                |
| H9                      | -                                                           | <b>1 (0.028)</b>   | -                 | -                | -                |
| H10                     | -                                                           | <b>1 (0.028)</b>   | -                 | -                | -                |
| H11                     | -                                                           | <b>1 (0.028)</b>   | -                 | -                | -                |
| H12                     | -                                                           | <b>1 (0.028)</b>   | -                 | -                | -                |
| H13                     | -                                                           | <b>1 (0.028)</b>   | -                 | -                | -                |
| H14                     | -                                                           | <b>1 (0.028)</b>   | -                 | -                | -                |
| H15                     | -                                                           | <b>1 (0.028)</b>   | -                 | -                | -                |
| H16                     | <b>1 (0.035)</b>                                            | -                  | -                 | -                | -                |
| H17                     | <b>1 (0.035)</b>                                            | -                  | -                 | -                | -                |
| H18                     | <b>1 (0.035)</b>                                            | -                  | -                 | -                | -                |
| H19                     | <b>1 (0.035)</b>                                            | -                  | -                 | -                | -                |
| H20                     | <b>1 (0.035)</b>                                            | -                  | -                 | -                | -                |
| H21                     | <b>1 (0.035)</b>                                            | -                  | -                 | -                | -                |
| H22                     | <b>1 (0.035)</b>                                            | -                  | -                 | -                | -                |
| H23                     | <b>1 (0.035)</b>                                            | -                  | -                 | -                | -                |
| H24                     | <b>1 (0.035)</b>                                            | -                  | -                 | -                | -                |
| H25                     | -                                                           | -                  | <b>1 (0.025)</b>  | -                | -                |
| H26                     | -                                                           | -                  | <b>1 (0.025)</b>  | -                | -                |
| H27                     | -                                                           | -                  | <b>1 (0.025)</b>  | -                | -                |
| H28                     | -                                                           | -                  | <b>1 (0.025)</b>  | -                | -                |
| H29                     | -                                                           | -                  | <b>1 (0.025)</b>  | -                | -                |
| H30                     | -                                                           | -                  | <b>1 (0.025)</b>  | -                | -                |
| H31                     | -                                                           | -                  | <b>1 (0.025)</b>  | -                | -                |
| H32                     | -                                                           | -                  | <b>2 (0.050)</b>  | -                | -                |
| H33                     | -                                                           | -                  | -                 | <b>1 (0.027)</b> | <b>1 (0.055)</b> |
| H34                     | -                                                           | -                  | -                 | <b>2 (0.055)</b> | -                |
| H35                     | -                                                           | -                  | -                 | <b>2 (0.055)</b> | -                |
| H36                     | -                                                           | -                  | -                 | -                | <b>2 (0.111)</b> |
| H37                     | <b>2 (0.071)</b>                                            | -                  | -                 | -                | -                |
| H38                     | <b>2 (0.071)</b>                                            | -                  | -                 | -                | -                |
| H39                     | <b>2 (0.071)</b>                                            | -                  | -                 | -                | -                |
| H40                     | -                                                           | <b>2 (0.057)</b>   | -                 | -                | -                |
| H41                     | <b>1 (0.035)</b>                                            | <b>1 (0.028)</b>   | -                 | -                | -                |

**Table S2 Contd.**

|            |                  |                  |                  |                   |                  |
|------------|------------------|------------------|------------------|-------------------|------------------|
| <b>H42</b> | <b>1 (0.035)</b> | <b>1 (0.028)</b> | -                | -                 | -                |
| <b>H43</b> | <b>2 (0.071)</b> | <b>1 (0.028)</b> | -                | -                 | -                |
| <b>H44</b> | -                | -                | <b>2 (0.050)</b> | <b>1 (0.027)</b>  | -                |
| <b>H45</b> | -                | -                | <b>3 (0.075)</b> | -                 | -                |
| <b>H46</b> | -                | -                | <b>3 (0.075)</b> | -                 | -                |
| <b>H47</b> | -                | -                | -                | <b>1 (0.027)</b>  | <b>2 (0.111)</b> |
| <b>H48</b> | <b>4 (0.142)</b> | -                | -                | -                 | -                |
| <b>H49</b> | -                | <b>4 (0.114)</b> | <b>1 (0.025)</b> | -                 | -                |
| <b>H50</b> | <b>1 (0.035)</b> | <b>3 (0.085)</b> | <b>1 (0.025)</b> | -                 | -                |
| <b>H51</b> | <b>2 (0.071)</b> | -                | -                | <b>1 (0.027)</b>  | <b>2 (0.111)</b> |
| <b>H52</b> | -                | -                | <b>5 (0.125)</b> | -                 | -                |
| <b>H53</b> | -                | -                | -                | <b>1 (0.027)</b>  | <b>4 (0.222)</b> |
| <b>H54</b> | <b>1 (0.035)</b> | -                | <b>5 (0.125)</b> | -                 | -                |
| <b>H55</b> | <b>1 (0.035)</b> | -                | -                | <b>4 (0.111)</b>  | <b>3 (0.166)</b> |
| <b>H56</b> | -                | <b>1 (0.028)</b> | <b>3 (0.075)</b> | <b>17 (0.472)</b> | -                |
| <b>H57</b> | -                | <b>7 (0.200)</b> | <b>8 (0.200)</b> | <b>6 (0.166)</b>  | <b>4 (0.222)</b> |

**n**; number of isolates; <sup>a</sup>, Haplotypes are same as defined in Table S1
